# Supplementary material for: High-performance Si-based 3D Cu nanostructured electrode assembly for rechargeable lithium batteries
Source: Royal Society of Chemistry journal article supplement (doi:10.1039/c5ta01978h), 2015-01-01
Supplement: c5ta01978h1.pdf [file c5ta01978h1.pdf]

# High-Performance Si-based 3D Cu Nanostructured Electrode Assembly for Rechargeable Lithium Batteries

Supplementary Figures

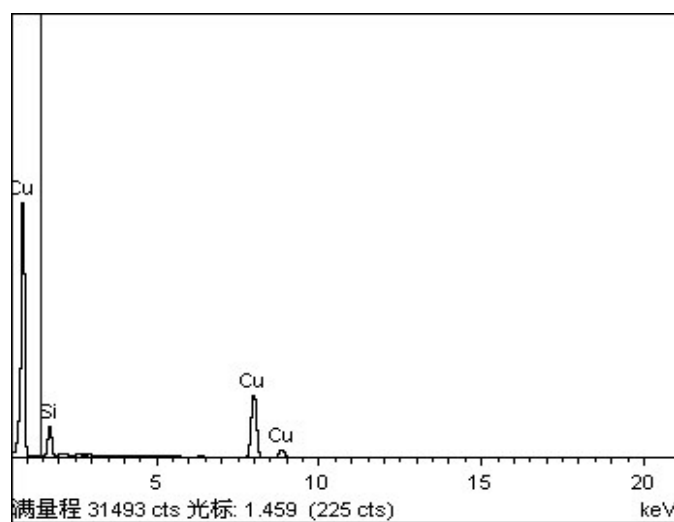

Figure S1 EDX spectrum of Si/Cu NCA structures.

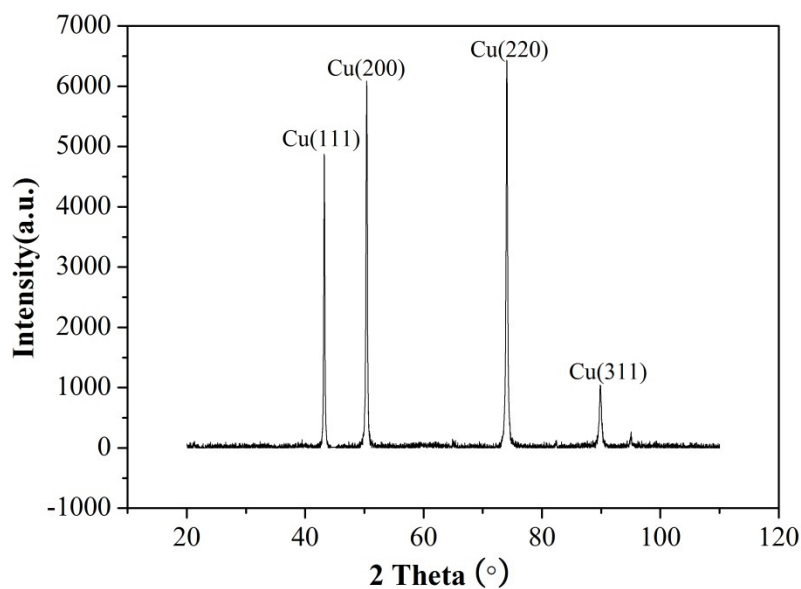

Figure S2 X-ray diffraction pattern of Si/Cu NCA structures.

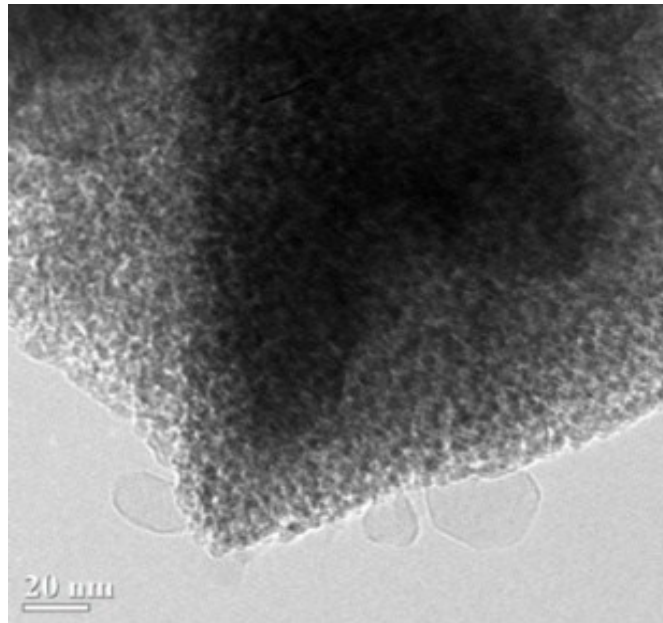

Figure S3 High-magnification TEM image of a single cone structure after lithiation.

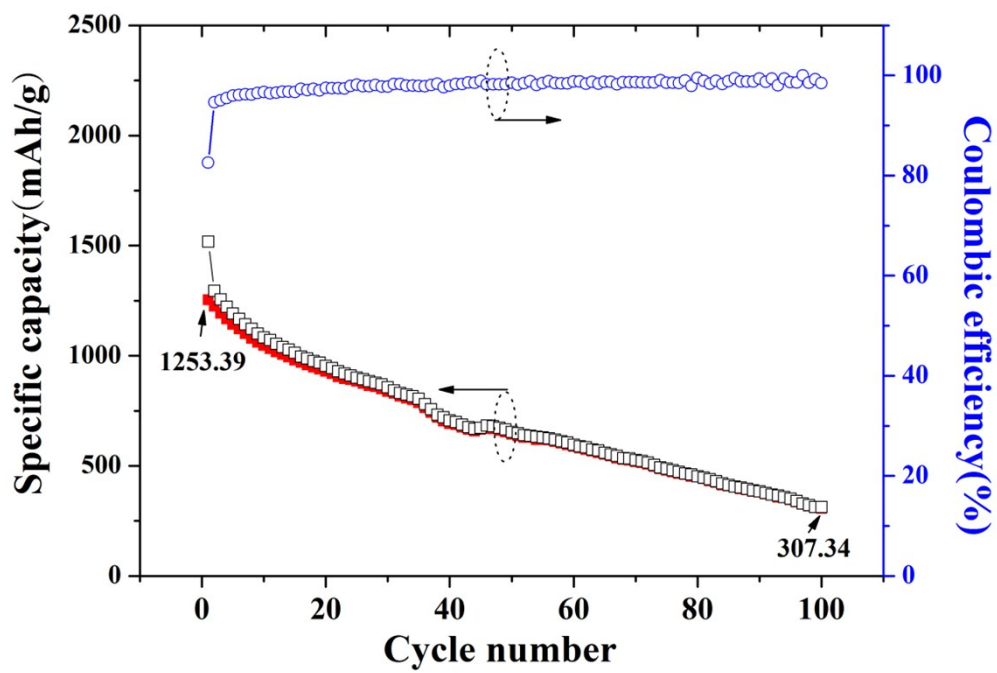

Figure S4 Cycling performance of planar 70CuSi electrodes at 1.2 C after initial activation of low current in the voltage range 0.01-1.6 V vs  $\text{Li}^+/\text{Li}$ .
